# Supplementary material for: Comparative Analysis of the Evolution of Green Leaf Volatiles and Aroma in Six<em> Vitis vinifera</em> L. Cultivars during Berry Maturation in the Chinese Loess Plateau Region
Source: Preprints.org preprint supplement (doi:10.20944/preprints202403.1217.v1), 2024-03-21
Supplement: Supplementary file 1 [file supplementary]

Table S1. Temperature and rainfall conditions during vintages 2019 and 2020.

|                               | April | May   | June  | July  | August | September |
|-------------------------------|-------|-------|-------|-------|--------|-----------|
| Vintage 2019                  |       |       |       |       |        |           |
| Mean maximum temperature (°C) | 23.20 | 28.60 | 33.50 | 35.00 | 31.40  | 27.70     |
| Mean minimum temperature (°C) | 10.99 | 15.62 | 21.62 | 23.73 | 21.99  | 17.14     |
| Mean temperature (°C)         | 16.35 | 21.88 | 27.08 | 28.85 | 26.16  | 21.55     |
| Mean relative humidity        | 49.50 | 32.40 | 37.80 | 44.50 | 54.10  | 52.40     |
| Sum rainfall (mm)             | 40.60 | 3.20  | 75.20 | 35.00 | 66.30  | 111.90    |
| Mean sunshine hours (h)       | 8.53  | 8.81  | 9.07  | 9.68  | 9.72   | 9.12      |
| Vintage 2020                  |       |       |       |       |        |           |
| Mean maximum temperature (°C) | 22.74 | 29.66 | 32.26 | 31.92 | 30.45  | 27.42     |
| Mean minimum temperature (°C) | 8.55  | 15.99 | 20.75 | 21.88 | 22.10  | 16.80     |
| Mean temperature (°C)         | 15.37 | 22.61 | 26.01 | 26.38 | 25.48  | 21.52     |
| Mean relative humidity        | 39.04 | 40.64 | 47.68 | 58.20 | 68.39  | 56.38     |
| Sum rainfall (mm)             | 30.80 | 62.70 | 55.40 | 77.70 | 183.70 | 10.80     |
| Mean sunshine hours (h)       | 10.39 | 10.24 | 10.27 | 10.57 | 11.07  | 10.13     |

Table S2. Physicochemical parameters in the berries of six *Vitis vinifera* L. cultivars at harvest.

| Vintages | Varieties          | TSS (Brix) <sup>a</sup> | TA (g/L) <sup>b</sup> | pH          |
|----------|--------------------|-------------------------|-----------------------|-------------|
| 2019     | Chardonnay         | 19.29±0.11 d            | 5.84±0.05 a           | 4.16±0.01 c |
|          | Sauvignon Blanc    | 19.94±0.36 c            | 5.47±0.14 b           | 4.29±0.02 a |
|          | Cabernet Sauvignon | 22.90±0.10 b            | 5.23±0.02 c           | 4.30±0.00 a |
|          | Cabernet Franc     | 22.71±0.22 b            | 4.57±0.10 e           | 4.31±0.01 a |
|          | Cabernet Gernischt | 19.22±0.09 d            | 4.94±0.03 d           | 4.24±0.01 b |
|          | Marselan           | 23.65±0.42 a            | 5.16±0.05 c           | 4.14±0.01 c |
| 2020     | Chardonnay         | 18.93±0.51 d            | 5.74±0.30 b           | 3.84±0.01 c |
|          | Sauvignon Blanc    | 18.87±0.32 d            | 6.30±0.09 a           | 3.70±0.02 d |
|          | Cabernet Sauvignon | 21.07±0.60 b            | 4.02±0.04 d           | 4.01±0.00 b |
|          | Cabernet Franc     | 22.53±0.29 a            | 5.61±0.34 b           | 4.15±0.04 a |
|          | Cabernet Gernischt | 19.97±0.06 c            | 4.92±0.17 c           | 4.20±0.03 a |
|          | Marselan           | 22.47±0.25 a            | 5.64±0.21 b           | 3.97±0.03 b |













Table S9. Primer used in real-time PCR

| Gene    | Sense                      | Antisense                   |
|---------|----------------------------|-----------------------------|
| VvActin | GCATCCCTCAGCACCTTCCAGCAG   | CCACCTCAACACATCTCCATGTCAACC |
| VvLOXA  | GCAAATCAAAGGGACAACGCTGTATG | TGCTTCCACTGCGGCTTCC         |
| VvHPL   | AAGTACACCGGCGACATTCGAG     | AGCTCTTACCCTGGCGTGTTG       |
| VvADH1  | TCCGTTCCTCAGAGATCAACAA     | ACTCTCTCATCTCAAGATATTCTATGG |
| VvADH2  | ATTCCAGTCGGCATAAGTGT       | TTGCAACTGCATAGACATTGTT      |
| VvAAT   | TTAATTCAGGTGAcCCGATT       | TCTCCATACACATGCCATTAG       |

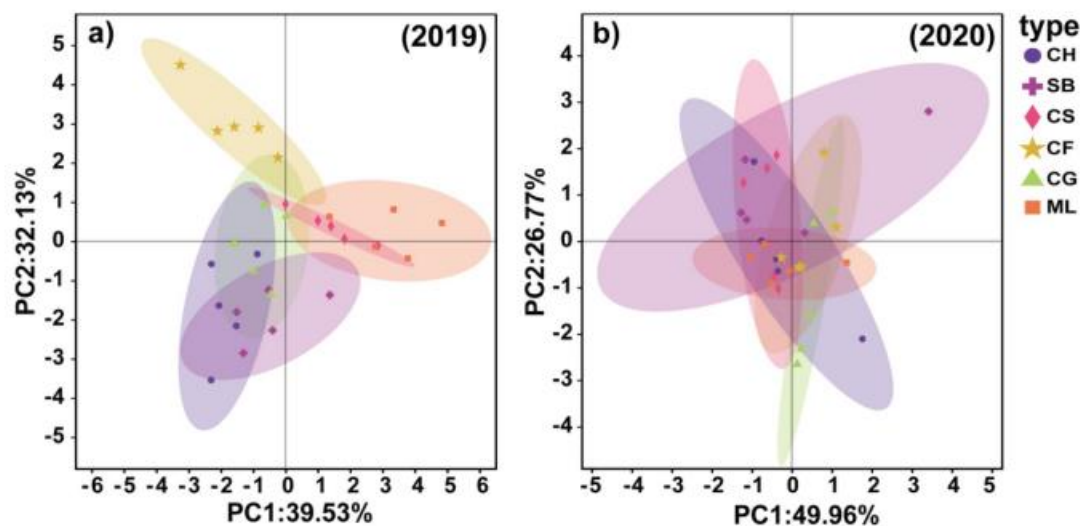

Fig. S1. Principal component analysis biplot illustrating the pattern of green leaf volatiles

(GLVs) at different stages of the berry maturation in vintage 2019 (a) and vintage 2020 (b).

Legend: ●-Chardonnay, + -Sauvignon Blanc, ◆-Cabernet Sauvignon, ★-Cabernet Franc,

▲-Cabernet Gernischt, ■-Marselan.
